# Supplementary material for: Exploring the miRNAs Profile in Dark-Cutting Beef
Source: MDPI journal article supplement (doi:10.3390/foods13060960), 2024-03-21
Supplement: s1 [file s1]

**Table S1.** Ranking of the most stable miRNAs according to the Normfinder algorithm.

| <b>miRNA</b>          | <b>C<sub>t</sub> (CONTROL)</b><br>(mean $\pm$ SEM) | <b>C<sub>t</sub> (DFD)</b><br>(mean $\pm$ SEM) | <b>p-value</b> |
|-----------------------|----------------------------------------------------|------------------------------------------------|----------------|
| <b>mmu-let-7d</b>     | 28.55 $\pm$ 0.7                                    | 28.96 $\pm$ 0.8                                | 0.313          |
| <b>hsa-miR-125b</b>   | 24.79 $\pm$ 0.7                                    | 25.03 $\pm$ 0.9                                | 0.580          |
| <b>bta-miR-425-5p</b> | 29.93 $\pm$ 0.8                                    | 30.25 $\pm$ 0.9                                | 0.486          |
| <b>bta-miR-660</b>    | 27.87 $\pm$ 0.8                                    | 28.22 $\pm$ 0.8                                | 0.430          |
| <b>hsa-miR-148b</b>   | 28.93 $\pm$ 0.6                                    | 29.02 $\pm$ 0.8                                | 0.814          |
| <b>hsa-miR-151-3p</b> | 28.55 $\pm$ 0.7                                    | 28.96 $\pm$ 0.8                                | 0.640          |
| <b>hsa-miR-10b</b>    | 24.67 $\pm$ 0.7                                    | 25.04 $\pm$ 0.9                                | 0.417          |
| <b>bta-miR-342</b>    | 26.41 $\pm$ 0.6                                    | 26.76 $\pm$ 0.8                                | 0.348          |

**DFD:** dark, firm and dry.
